# Supplementary material for: The Effect of Different Algorithms on Prevalence of Attention Deficit Hyperactivity Disorder and Autism Spectrum Disorder in Secondary Healthcare Data in Five European Countries: A Contribution from the ConcePTION Project
Source: Springer Nature journal article supplement (doi:10.1007/s10803-025-06997-4), 2025-08-22
Supplement: MOESM1 [file 10803_2025_6997_MOESM1_ESM.docx]

## Supplementary table 1 Codes used to identify ADHD

| **Coding system** | **Code** | **Code description** |
| --- | --- | --- |
| ICD-10 | F90 | Hyperkinetic disorders |
| ICD-10 | F90.0 | Disturbance of activity and attention |
| ICD-10 | F90.1 | Hyperkinetic conduct disorder |
| ICD-10 | F90.8 | Other hyperkinetic disorders |
| ICD-10 | F90.9 | Hyperkinetic disorder, unspecified |
| ICD-10-CM | F90 | attention deficit disorder with hyperactivity |
| ICD-10-CM | F90.0 | Attention-deficit hyperactivity disorder, predominantly inattentive type |
| ICD-10-CM | F90.1 | Attention-deficit hyperactivity disorder, predominantly hyperactive type |
| ICD-10-CM | F90.2 | Attention-deficit hyperactivity disorder, combined type |
| ICD-10-CM | F90.8 | Attention-deficit hyperactivity disorder, other type |
| ICD-10-CM | F90.9 | Attention-deficit hyperactivity disorder, unspecified type |
| ICD-9-CM | 314 | Hyperkinetic syndrome of childhood |
| ICD-9-CM | 314.0 | Attention deficit disorder of childhood |
| ICD-9-CM | 314.00 | Attention deficit disorder without mention of hyperactivity |
| ICD-9-CM | 314.01 | Attention deficit disorder with hyperactivity |
| ICD-9-CM | 314.1 | Hyperkinesis with developmental delay |
| ICD-9-CM | 314.2 | Hyperkinetic conduct disorder |
| ICD-9-CM | 314.8 | Other specified manifestations of hyperkinetic syndrome |
| ICD-9-CM | 314.9 | Unspecified hyperkinetic syndrome |
| ICPC-2 | P21 | Hyperkinetic syndrome |
| ICPC-2 | P21 | Disorder;attent deficit(hyper) |
| ICPC-2 | P81 | Hyperkinetic syndrome |
| ICPC-2 | P81 | Disorder;attent deficit(hyper) |

ICD-9/ICD-10(-CM) = International Classification of Diseases, 9th/10th revision (-clinical modification); ICPC2 = International Classification of Primary Care, 2nd edition

##

## Supplementary table 2 Codes used to identify ASD

| **Code description** | **Coding system and codes used** | | | | |
| --- | --- | --- | --- | --- | --- |
| **ICD-10** | **ICD-10-CM** | **ICD-9-CM** | **ICPC-2** | **Read code v2** |
| Pervasive developmental disorders | F84 (excluding F84.2; F84.3 and F84.4) | F84 (excluding F84.2; F84.3 and F84.4) | 299 (excluding 299.10 and 299.11) |  |  |
| Childhood autism | F84.0 |  |  |  | E140.13 |
| Atypical autism | F84.1 | F84.9 |  |  |  |
| Asperger's syndrome | F84.5 | F84.5 |  | P99 |  |
| Other pervasive developmental disorders | F84.8 | F84.8 |  |  |  |
| Pervasive developmental disorder, unspecified | F84.9 | F84.9 |  |  |  |
| Autistic disorder |  | F84.0 | 299.0 |  |  |
| Autistic disorder, current or active state |  |  | 299.00 |  |  |
| Autistic disorder, residual state |  |  | 299.01 |  |  |
| Other specified pervasive developmental disorders |  |  | 299.8 |  |  |
| Other specified pervasive developmental disorders, current or active state |  |  | 299.80 |  |  |
| Other specified pervasive developmental disorders, residual state |  |  | 299.81 |  |  |
| Unspecified pervasive developmental disorder |  |  | 299.9 |  |  |
| Unspecified pervasive developmental disorder, current or active state |  |  | 299.90 |  |  |
| Unspecified pervasive developmental disorder, residual state |  |  | 299.91 |  |  |
| Autism |  |  |  | P99 | E140.12 |
| Autism;child |  |  |  | P99 |  |
| Infantile autism |  |  |  |  | E140. and E140.00 |
| Kanner's syndrome |  |  |  |  | E140.11 |
| Infantile autism - active |  |  |  |  | E1400 |
| Active infantile autism |  |  |  |  | E140000 |
| Infantile autism - residual |  |  |  |  | E1401 |
| Residual infantile autism |  |  |  |  | E140100 |
| Infantile autism NOS |  |  |  |  | E140z |
| Infantile autism NOS |  |  |  |  | E140z00 |
| [x]childhood autism |  |  |  |  | Eu840 |
| [X]Childhood autism |  |  |  |  | Eu84000 |
| [X]Autistic disorder |  |  |  |  | Eu84011 |
| [X]Infantile autism |  |  |  |  | Eu84012 |
| [X]Kanner's syndrome |  |  |  |  | Eu84014 |
| [X]Atypical autism |  |  |  |  | Eu841 and Eu84100 |
| [X]Asperger's syndrome |  |  |  |  | Eu845 and Eu84500 |
| [X]Autistic psychopathy |  |  |  |  | Eu84511 |
| [X]Oth pervasive develop dis |  |  |  |  | Eu84y |
| [X]Pervasive develop dis unsp |  |  |  |  | Eu84z |
| [X]Autistic spectrum disorder |  |  |  |  | Eu84z11 |

ICD-9/ICD-10(-CM) = International Classification of Diseases, 9th/10th revision (-clinical modification); ICPC2 = International Classification of Primary Care, 2nd edition

##

## Supplementary table 3 ATC codes for medication used to identify ADHD

| ATC code | Chemical substance |
| --- | --- |
| C02AC02 | Guanfacine |
| N06BA01 | Amphetamine |
| N06BA02 | Dexamfetamine sulfate |
| N06BA04 | Methylphenidate |
| N06BA09 | Atomoxetine |
| N06BA11 | Dexmethylphenidate |
| N06BA12 | Lisdexamfetamine |

ATC= Anatomical Therapeutic Chemical Classification

## Supplementary table 4 Median and mean time between first and second ADHD or ASD diagnoses (months) among males, females and the total population with more than one diagnosis recorded by country and setting

| **Country and setting** | **ADHD** | | | | | | **ASD** | | | | | |
| --- | --- | --- | --- | --- | --- | --- | --- | --- | --- | --- | --- | --- |
| **Male** | | **Female** | | **Total** | | **Male** | | **Female** | | **Total** | |
| **Median months (IQR)** | **Mean months (SD)** | **Median**  **months (IQR)** | **Mean**  **months (SD)** | **Median**  **months (IQR)** | **Mean**  **months (SD)** | **Median months (IQR)** | **Mean months (SD)** | **Median months (IQR)** | **Mean months (SD)** | **Median**  **months (IQR)** | **Mean months (SD)** |
| **Finland: Specialist care** | 3 (1-11) | 8.6 (15.1) | 2 (0-9) | 6.8 (12.7) | 3 (1-11) | 8.2 (14.6) | 3 (0-10) | 8.6 (17.1) | 2 (0-7) | 7.9 (17.9) | 2 (0-9) | 8.4 (17.3) |
| **Finland: Primary care** | 10 (3-20) | 14.4 (15.6) | 7 (2-14) | 11.2 (14.3) | 9 (3-18) | 13.7 (15.4) | 11 (3-27.2) | 17.6 (18.7) | 11 (2-24) | 14.7 (15.7) | 11 (3-27) | 17 (18.1) |
| **Italy, Emilia Romagna** | 0 (0-0) | 1.4 (4.9) | 0 (0-0) | 0.8 (3.3) | 0 (0-0) | 0 (4.7) | 0 (0-0) | 1.7 (5.8) | 0 (0-0) | 2.8 (6) | 0 (0-0) | 0 (5.9) |
| **Norway** | 0 (0-3) | 3.2 (7.9) | 0 (0-7) | 4.9 (10.2) | 0 (0-4) | 4 (8.7) | 0 (0-4) | 3.2 (6.9) | 1 (0-5) | 4.3 (10.2) | 1 (0-4) | 4 (7.8) |
| **Wales: Specialist** | **-** | - | - | - | - | - | 11 (2-31) | 22 (27.2) | 7 (1-21) | 16.6 (24.7) | 10 (2-29) | 20.8 (26.7) |
| **Wales: Primary care** | - | - | - | - | - | - | 11 (1-36) | 25.7 (34) | 9.5 (2-27.8) | 20.6 (27.1) | 10 (1-35) | 24.8 (32.9) |
